# Supplementary material
Source: Springer Nature journal article supplement (https://www.springermedizin.de/resource/supplementary/12891_2008_600_MOESM1_ESM.pdf/9506328)

## Psychopathology group

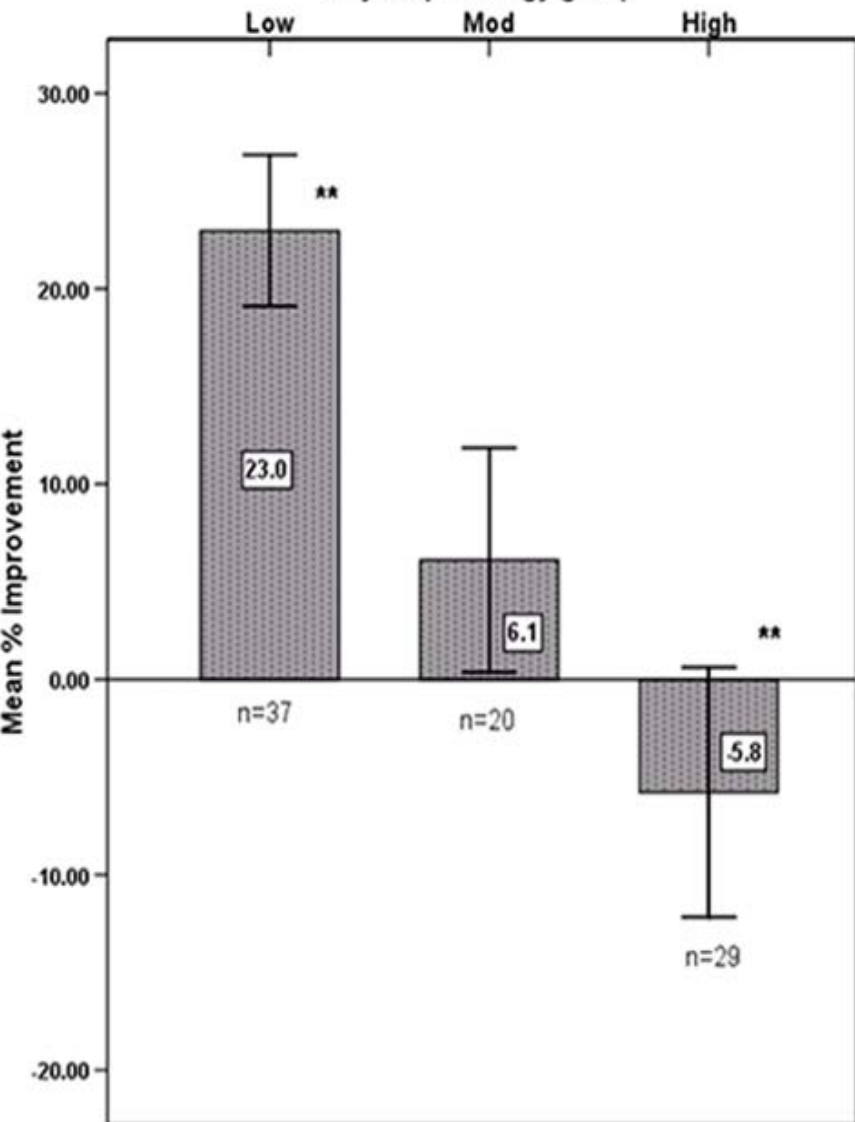

\*\*between group contrast,  $p=.0001$ ;  $F=8.7$ ,  $Rsq=.17$ ; Error bars:  $\pm 1$  SE

Supplement: MOESM1 [file 9506328]
